# Supplementary material for: Biocompatible diimidazolium based ionic liquid systems for enhancing the solubility of paclitaxel
Source: Royal Society of Chemistry journal article supplement (doi:10.1039/d3gc04333a), 2024-01-01
Supplement: d3gc04333a1.pdf [file d3gc04333a1.pdf]

## Biocompatible diimidazolium based ionic liquid system for enhancing the solubility of paclitaxel

Yanhui Hu,<sup>a,b,c</sup> Hua Yue,<sup>b,c</sup> Shiqi Huang,<sup>b</sup> Bingxi Song,<sup>b,c</sup> Yuyuan Xing,<sup>b,c</sup> Minmin Liu,<sup>b</sup> Gongying Wang,<sup>\*a,c</sup> Yanyan Diao<sup>\*b,d,e</sup>, Suojiang Zhang<sup>\*b,d</sup>

*a* Chengdu Institute of Organic Chemistry, Chinese Academy of Sciences, Chengdu 610041, China

*b* Beijing Key Laboratory of Ionic Liquids Clean Process, State Key Laboratory of Biochemical Engineering, Institute of Process Engineering, Chinese Academy of Sciences, Beijing, 100190, China

*c* University of Chinese Academy of Sciences, Beijing, 100049, China

*d* Longzihu New Energy Laboratory, Zhengzhou Institute of Emerging Industrial Technology, Henan University, Zhengzhou 450000, P. R. China

*e* School of Chemical & Environmental Engineering, China University of Mining and Technology (Beijing), Beijing 100083, P. R. China

\*Corresponding Author: Gongying Wang, Yanyan Diao, Suojiang Zhang

Tel/Fax: 86-10-82544875, E-mail: wanggongying1102@126.com, yydiao@ipe.ac.cn, sjzhang@ipe.ac.cn

### Characterizations of ILs

NMR as shown in Figure S1-S12, were carried out to identify the structures of the prepared diimidazole ILs.

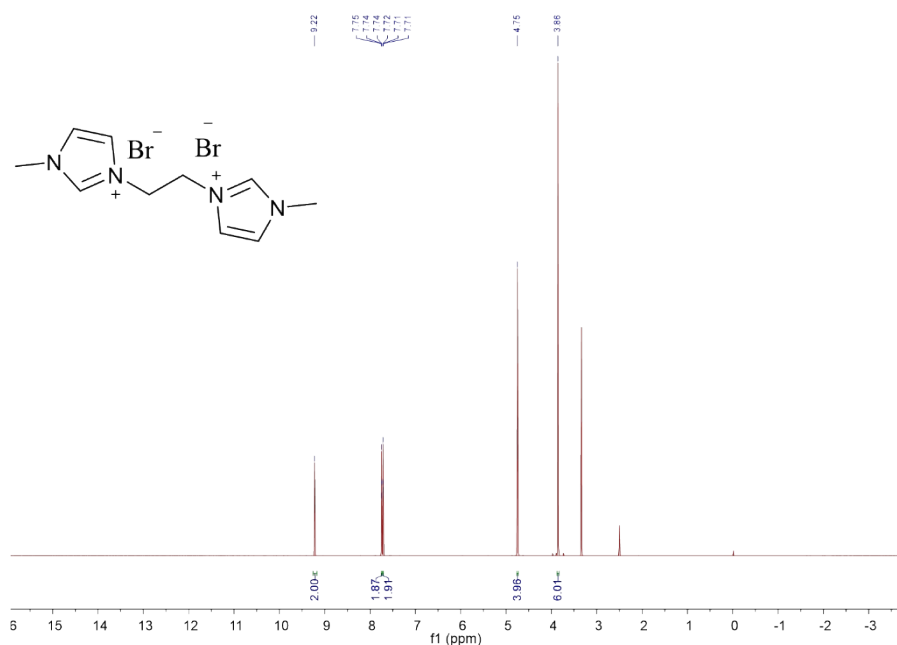

Fig. S1 The <sup>1</sup>H NMR spectrum of [C<sub>2</sub>(MIM)<sub>2</sub>][Br]<sub>2</sub> (DMSO)



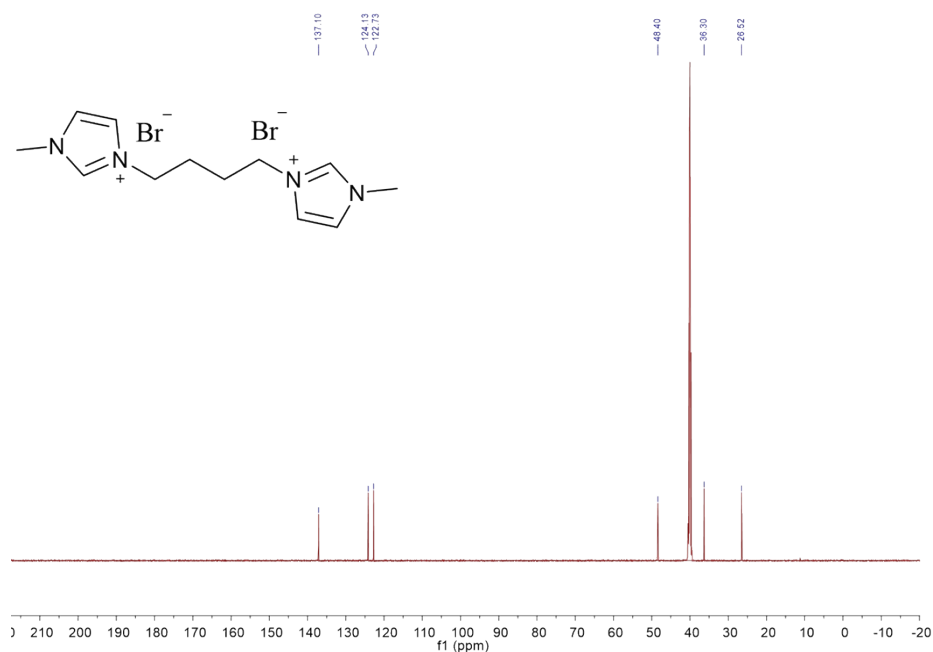

Fig. S4 The  $^{13}\text{C}$  NMR spectrum of  $[\text{C}_4(\text{MIM})_2][\text{Br}]_2$  (DMSO)

$[\text{C}_4(\text{MIM})_2][\text{Br}]_2$ :  $^1\text{H}$  NMR (600 MHz, DMSO)  $\delta$  9.26 (s, 2H), 7.82 (t,  $J = 1.7$  Hz, 2H), 7.74 (t,  $J = 1.5$  Hz, 2H), 4.25 (t,  $J = 5.7$  Hz, 4H), 3.87 (s, 6H), 1.80 (t,  $J = 2.8$  Hz, 4H).  $^{13}\text{C}$  NMR (151 MHz, DMSO)  $\delta$  137.00, 124.13, 122.73, 48.40, 36.30, 26.52.

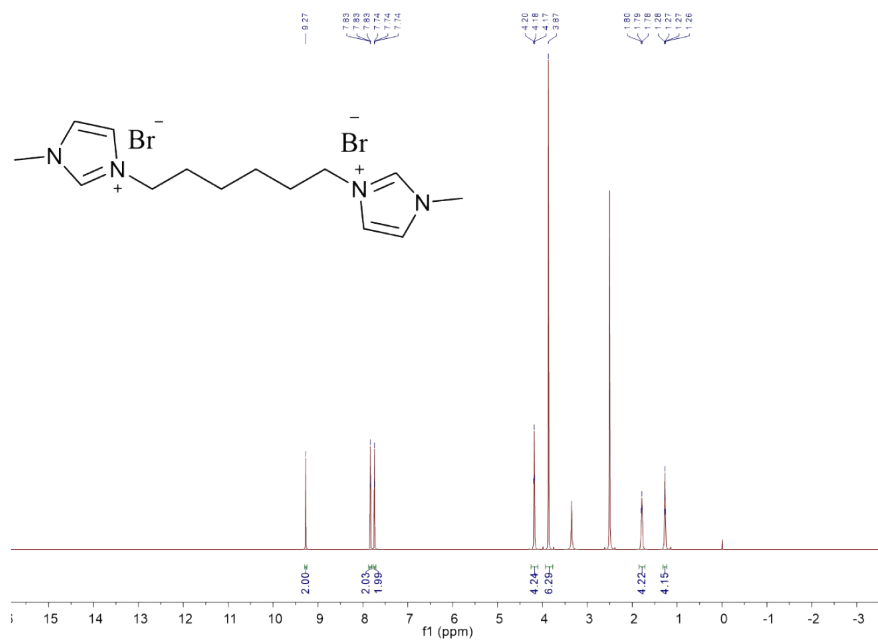

Fig. S5 The  $^1\text{H}$  NMR spectrum of  $[\text{C}_6(\text{MIM})_2][\text{Br}]_2$  (DMSO)

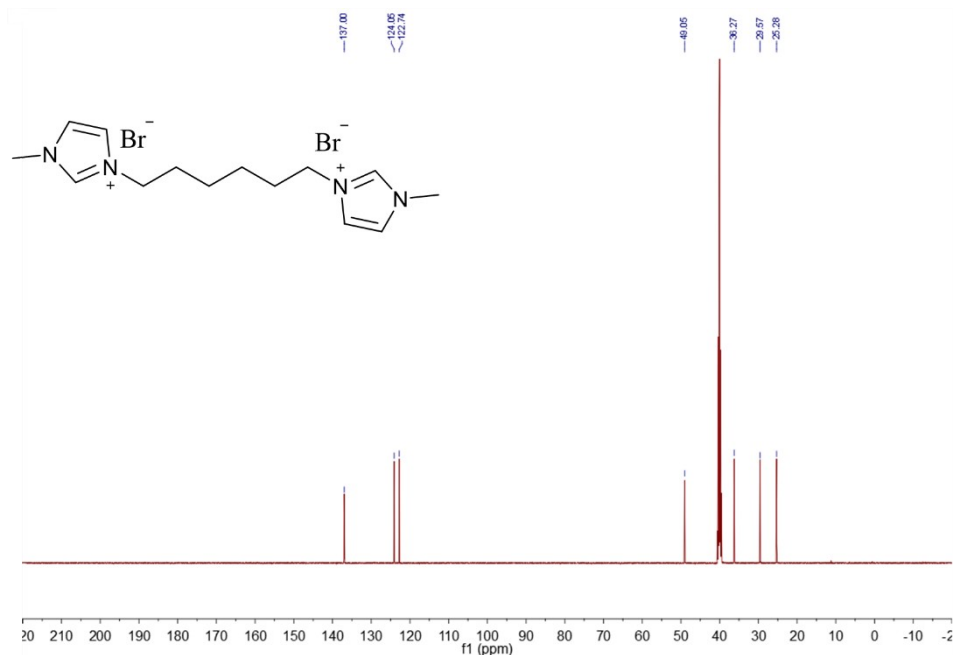

Fig. S6 The  $^{13}\text{C}$  NMR spectrum of  $[\text{C}_6(\text{MIM})_2][\text{Br}]_2$  (DMSO)

$[\text{C}_6(\text{MIM})_2][\text{Br}]_2$ :  $^1\text{H}$  NMR (600 MHz, DMSO)  $\delta$  9.27 (s, 2H), 7.83 (t,  $J = 1.6$  Hz, 2H), 7.74 (t,  $J = 1.6$  Hz, 2H), 4.18 (t,  $J = 7.2$  Hz, 4H), 3.87 (s, 6H), 1.85-1.72 (m, 4H), 1.27 (dd,  $J = 8.7, 5.5$  Hz, 4H).  $^{13}\text{C}$  NMR (151 MHz, DMSO)  $\delta$  137.00, 124.05, 122.74, 49.05, 36.27, 29.57, 25.28.

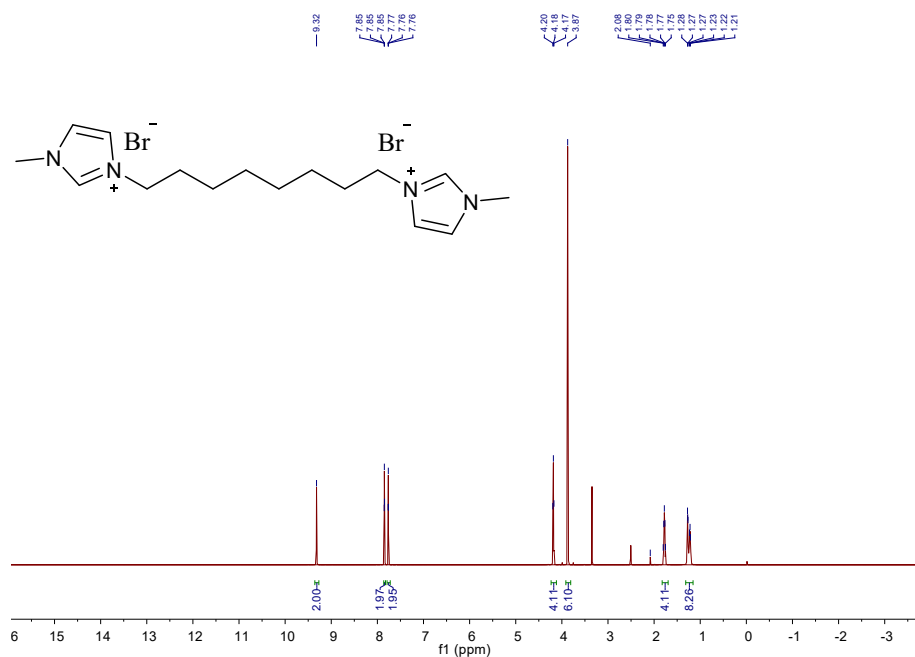

Fig. S7 The  $^1\text{H}$  NMR spectrum of  $[\text{C}_8(\text{MIM})_2][\text{Br}]_2$  (DMSO)

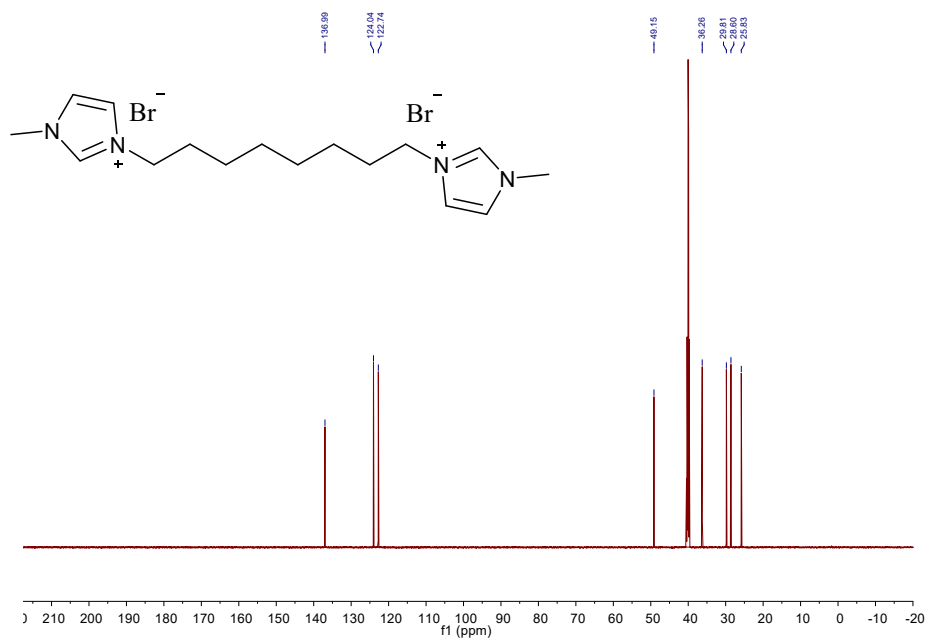

Fig. S8 The  $^{13}\text{C}$  NMR spectrum of  $[\text{C}_8(\text{MIM})_2][\text{Br}]_2$  (DMSO)

$[\text{C}_8(\text{MIM})_2][\text{Br}]_2$ :  $^1\text{H}$  NMR (600 MHz, DMSO)  $\delta$  9.32 (s, 2H), 7.85 (t,  $J = 1.7$  Hz, 2H), 7.76 (t,  $J = 1.7$  Hz, 2H), 4.18 (t,  $J = 7.2$  Hz, 4H), 3.87 (s, 6H), 1.83-1.70 (m, 4H), 1.31-1.16 (m, 8H).  $^{13}\text{C}$  NMR (151 MHz, DMSO)  $\delta$  136.99, 124.04, 122.74, 49.15, 36.26, 29.81, 28.60, 25.83.

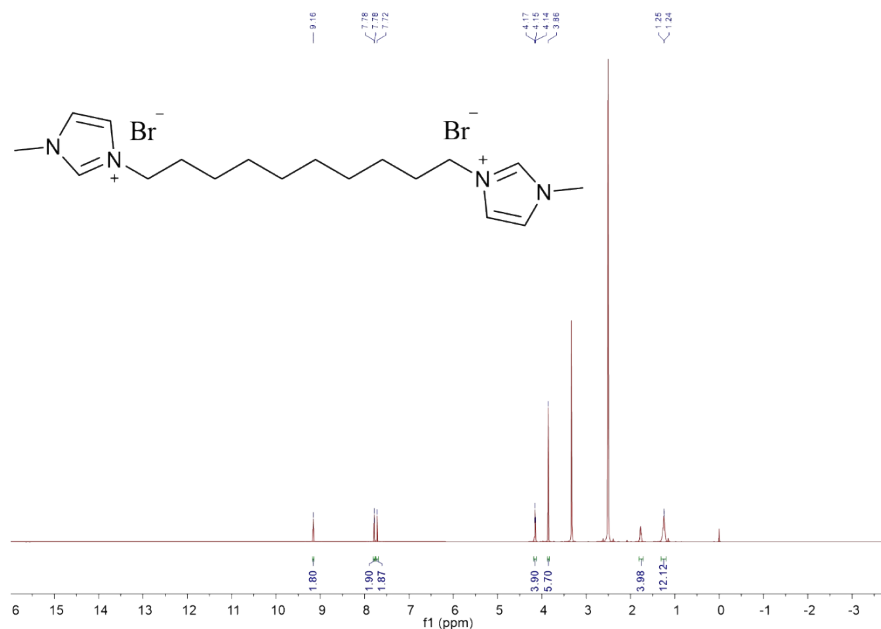

Fig. S9 The  $^1\text{H}$  NMR spectrum of  $[\text{C}_{10}(\text{MIM})_2][\text{Br}]_2$  (DMSO)

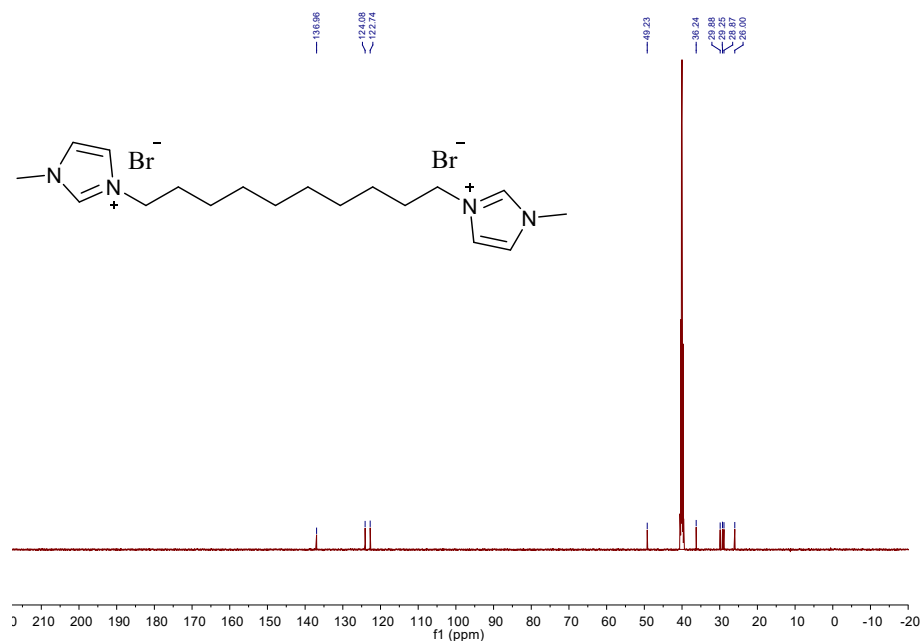

Fig. S10 The  $^{13}\text{C}$  NMR spectrum of  $[\text{C}_{10}(\text{MIM})_2][\text{Br}]_2$  (DMSO)

$[\text{C}_{10}(\text{MIM})_2][\text{Br}]_2$ :  $^1\text{H}$  NMR (600 MHz, DMSO)  $\delta$  9.16 (s, 2H), 7.78 (d,  $J = 1.6$  Hz, 2H), 7.72 (s, 2H), 4.15 (t,  $J = 7.2$  Hz, 4H), 3.86 (s, 6H), 1.81-1.72 (m, 4H), 1.25 (d,  $J = 4.0$  Hz, 12H).  $^{13}\text{C}$  NMR (151 MHz, DMSO)  $\delta$  136.96, 124.08, 122.74, 49.23, 36.24, 29.88, 29.25, 28.87, 26.00.

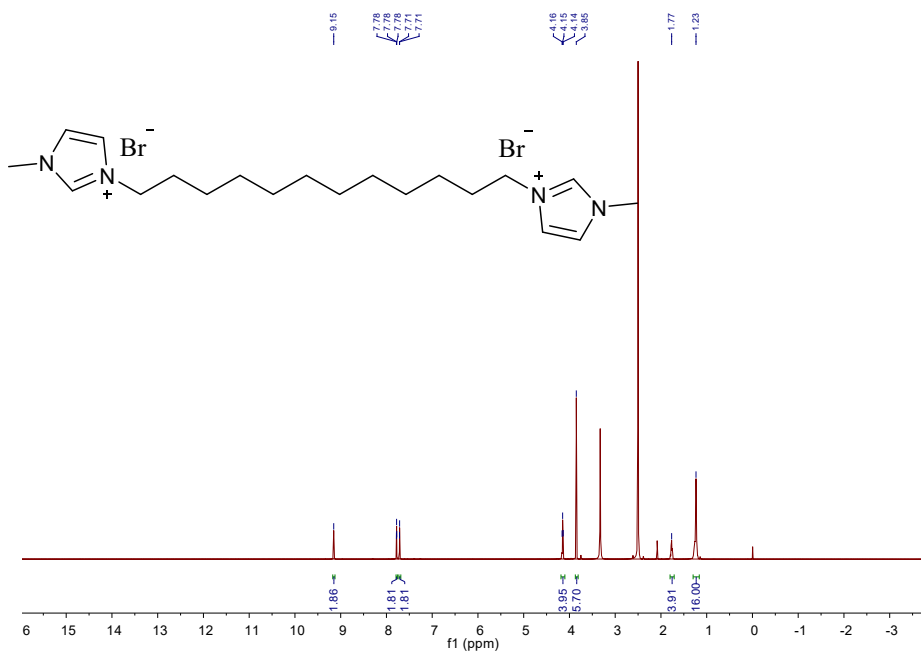

Fig. S11 The  $^1\text{H}$  NMR spectrum of  $[\text{C}_{12}(\text{MIM})_2][\text{Br}]_2$  (DMSO)

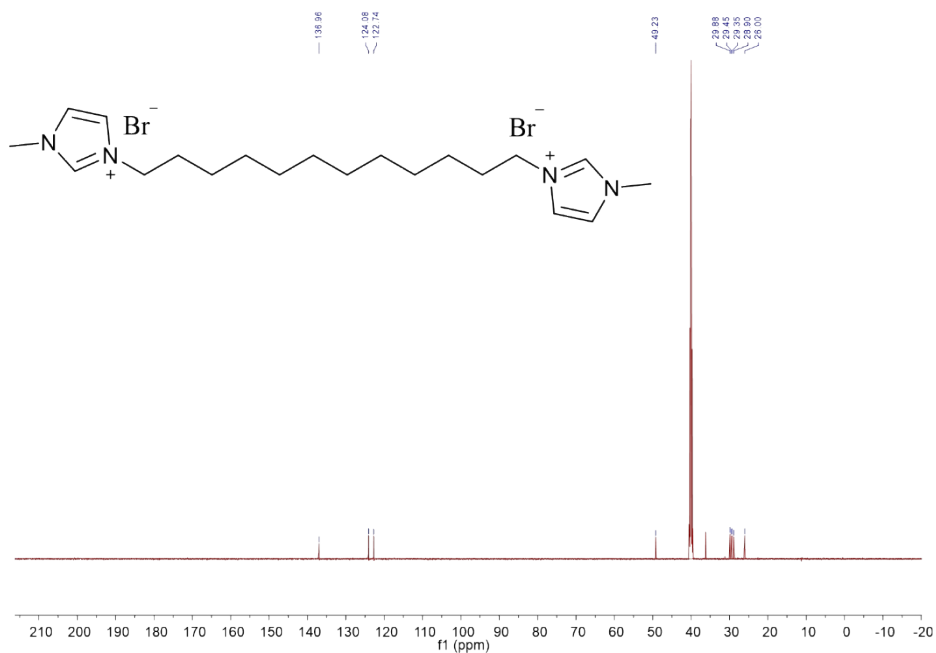

Fig. S12 The  $^{13}\text{C}$  NMR spectrum of  $[\text{C}_{12}(\text{MIM})_2][\text{Br}]_2$  (DMSO)

$[\text{C}_{12}(\text{MIM})_2][\text{Br}]_2$ :  $^1\text{H}$  NMR (600 MHz, DMSO)  $\delta$  9.15 (s, 2H), 7.78 (t,  $J = 1.6$  Hz, 2H), 7.71 (d,  $J = 1.6$  Hz, 2H), 4.15 (t,  $J = 7.2$  Hz, 4H), 3.85 (s, 6H), 1.77 (s, 4H), 1.23 (s, 16H).  $^{13}\text{C}$  NMR (151 MHz, DMSO)  $\delta$  136.96, 124.08, 122.74, 49.23, 29.88, 29.40, 28.90, 26.00.

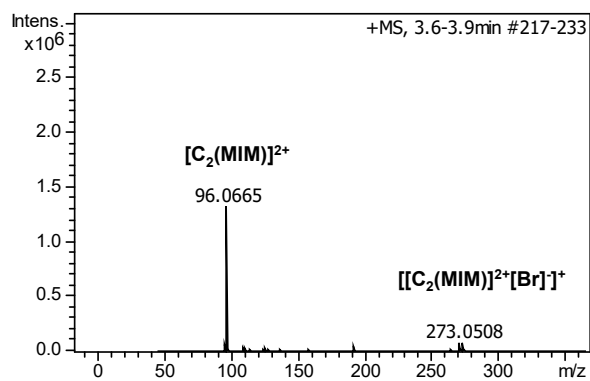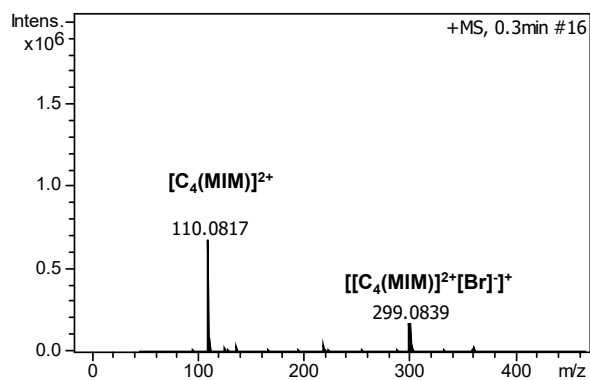

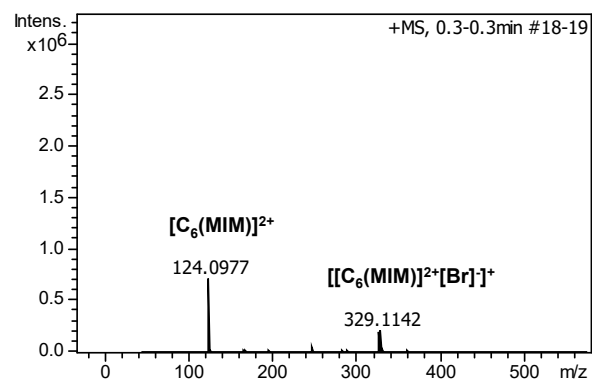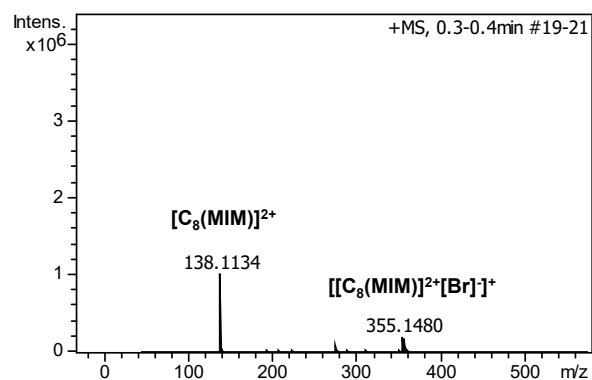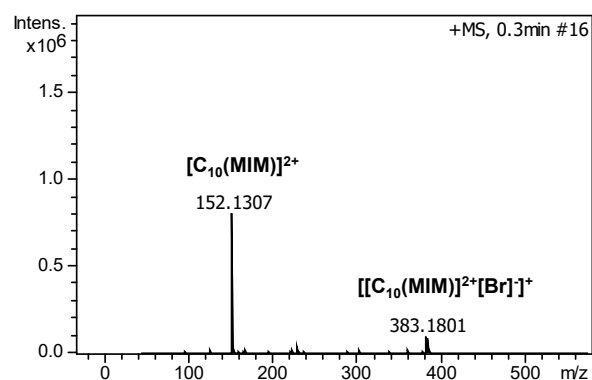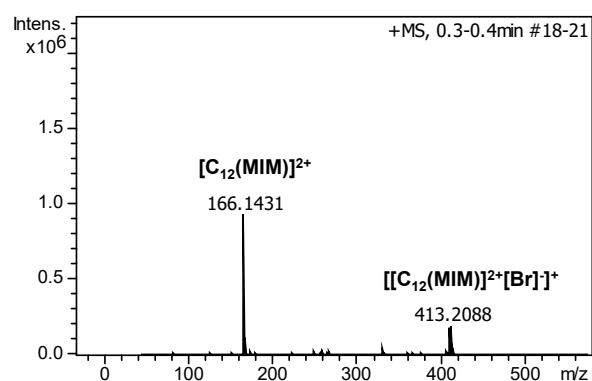

Fig. S13 ESI-MS spectrums of diimidazolium based ILs.



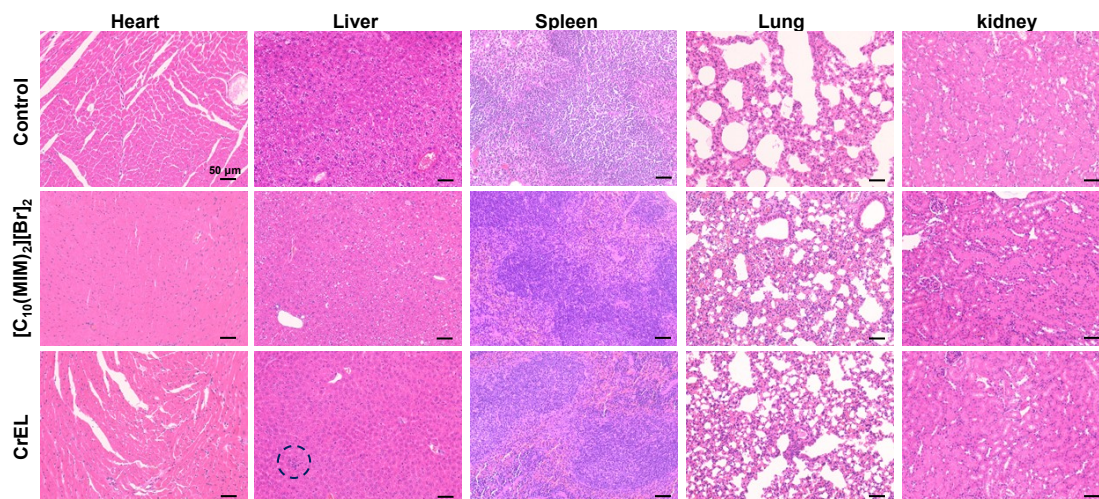

Fig. S14 Representative H&E staining of heart, liver, spleen, lung, and kidney tissues for mice by oral administration after day 7 with the dose of 250  $\mu\text{mol/kg}$   $[\text{C}_{10}(\text{MIM})_2][\text{Br}]_2$  or CrEL. The dashed area represents inflammatory infiltration.

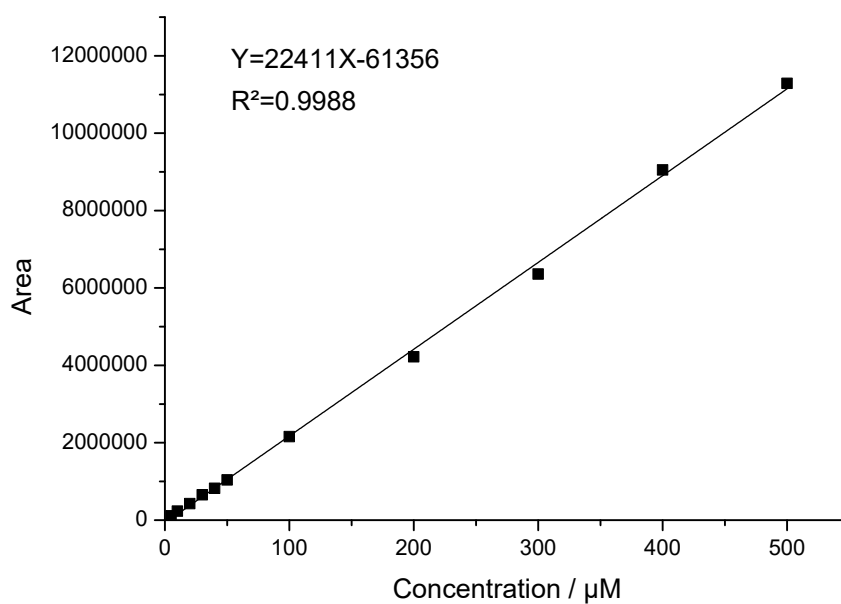

Fig. S15 The standard curve of peak area and PTX concentration conversion (5-500  $\mu\text{M}$ ) by UPLC at 227 nm.

Table S1 The comparison of cationic logP between mono-imidazole and diimidazole ILs predicted by MarvinSketch

| Carbon number of cationic alkyl chain | Cationic logP of mono-imidazolium based ILs | Cationic logP of diimidazolium based ILs |
|---------------------------------------|---------------------------------------------|------------------------------------------|
| 2                                     | -2.48                                       | -5.85                                    |
| 4                                     | -1.52                                       | -5.27                                    |

|    |      |       |
|----|------|-------|
| 6  | 0.39 | -4.38 |
| 8  | 1.28 | -3.49 |
| 10 | 2.17 | -2.61 |
| 12 | 3.06 | -1.72 |

---
